# Supplementary material for: Post-acute health care burden after SARS-CoV-2 infection: A retrospective cohort study of long COVID among 530,892 adults
Source: bioRxiv or medRxiv preprint supplement (doi:10.1101/2022.05.06.22274782), 2022-05-07
Supplement: Supplementary file [file media-1.pdf]

**Post-acute health care utilization after SARS-CoV-2 infection: A retrospective cohort study of long COVID among 530,892 adults**

**Supplemental Materials**

**Figure E1.** Cohort Construction

**Figure E2:** Among individuals at the 95<sup>th</sup> percentile of health care utilization, additional health care encounters (95% CI) per person-year total and by type of health care encounter, comparing individuals with a positive SARS-CoV-2 PCR test to matched individuals with negative PCR: (A) overall (n=530,232), (B) women (n=271,346), and (C) men (n=258,886).

**Table E1.** ICES Databases

**Table E2.** Variables included in the propensity score for matching

**Table E3.** Unmatched cohort baseline characteristics

**Table E4.** Distribution of baseline healthcare use by counts and rates (per person-year) for the matched cohort (n= 530,232), overall and stratified by sex.

**Table E5:** Sensitivity analyses: (A) Follow-up begins after hospital discharge or 56 days, whichever occurred later, (B) follow-up censored on the date of entrance to long-term care, (C) follow-up censored at 6 months, and (D) matched by intensive care admission within two weeks after index date. All comparisons are for test-positive versus test-negative individuals. Distribution of follow-up time included for each analysis. Healthcare utilization rates reported per person-year. The difference in overall healthcare utilization rates between test-positive and negative individuals are reported for the mean, 95th percentile, and 99th percentile. Samples sizes as noted below.

Figure E1: Cohort construction

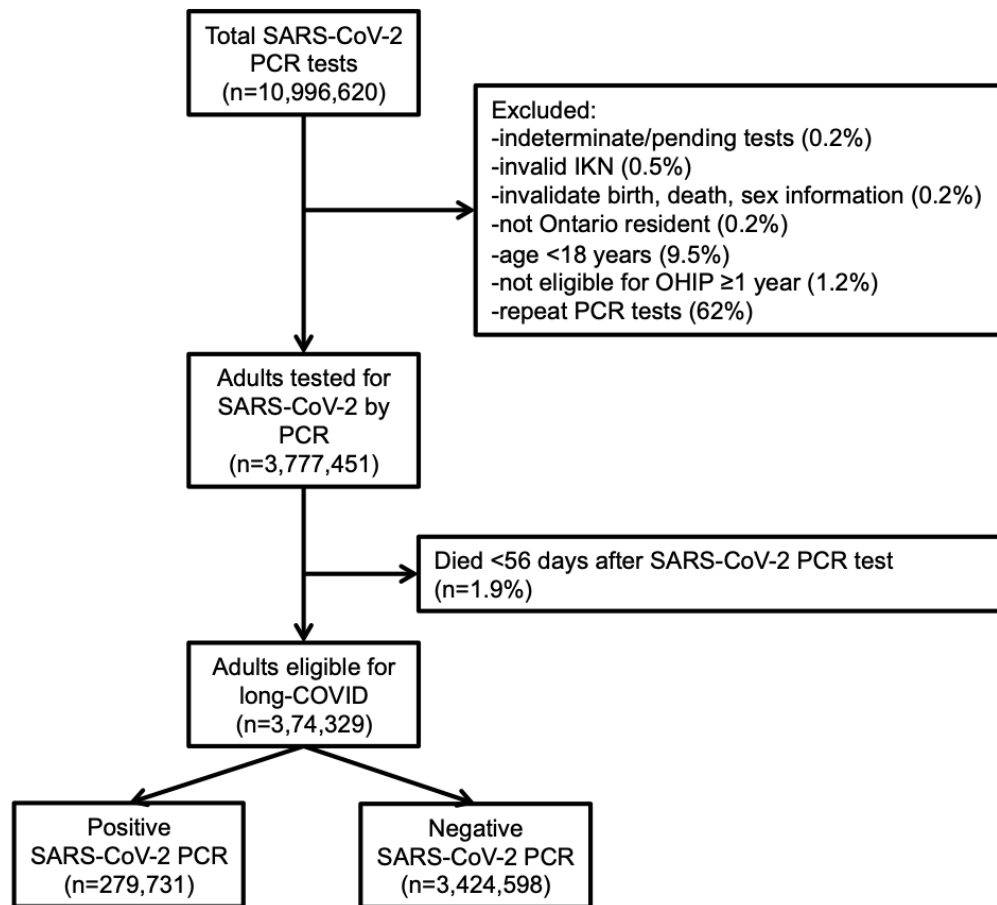

**Figure E2:** Among individuals at the 95<sup>th</sup> percentile of health care utilization, additional health care encounters (95% CI) per person-year total and by type of health care encounter, comparing individuals with a positive SARS-CoV-2 PCR test to matched individuals with negative PCR: (A) overall (n=530,232), (B) women (n=271,346), and (C) men (n=258,886).

**(A) Overall (n=530,232)**

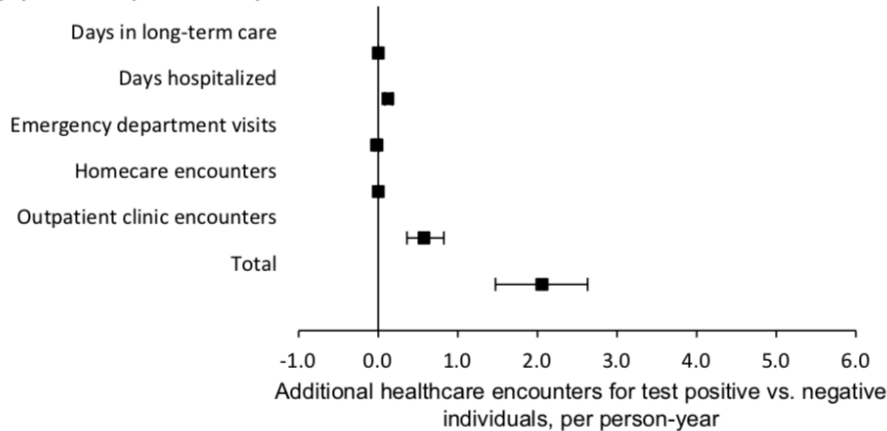

**(B) Women (n=271,346)**

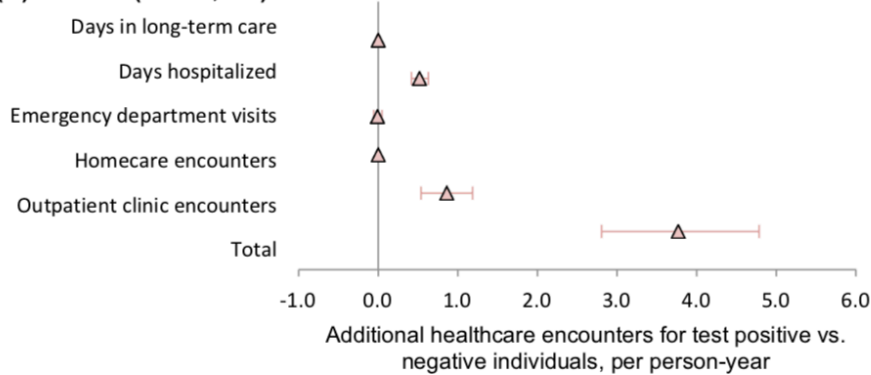

**(C) Men (n=258,886)**

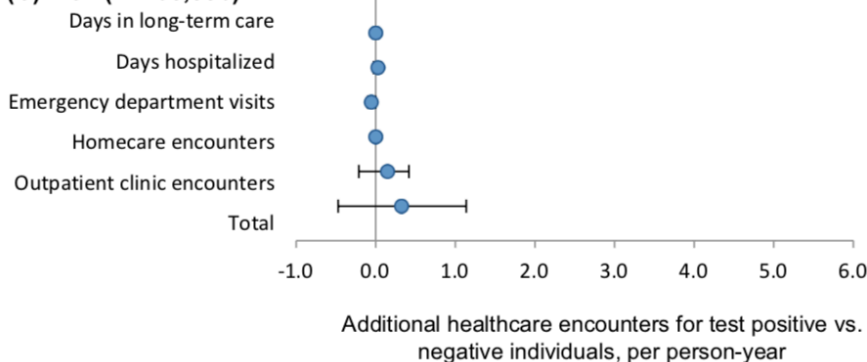

**Table E1. ICES Databases**

The following datasets were used for cohort construction, among others (Table E1): OHIP (contains all physician billing claims); the Registered Persons Database (maintains vital statistics, including out-of-hospital deaths); the Ontario Laboratories Information System (contains all PCR results for SARS-CoV-2 and was linked to the COVID19 database, which records all SARS-CoV-2 vaccinations); the Canadian Institute for Health Information Discharge Abstract Database (records all hospitalizations in Ontario); the National Ambulatory Care Reporting System (includes all emergency department visits in Ontario); and the Ministry of Health and Long-Term Care (MOHLTC; residence in long-term care).

|          |         |          |        |         |          |
|----------|---------|----------|--------|---------|----------|
| CIHI     | NRS     | HCD      | CENSUS | INST    | ODD      |
| OHIP     | ODB     | RAICA    | LIHN   | ASTHMA  | DEMENTIA |
| NACRS    | CCRS    | IPDB     | REF    | HYPER   | COPD     |
| SDS      | CONTACT | CPDP     | PCCF   | HIV     | ORAD     |
| OHMRS    | RAIHC   | RPDB     | DIN    | CHF     | OCCC     |
| ODD      | CCN     | OCR      | CDFP   | ADP     | ERCLAIM  |
| AVGPRICE | ORGD    | ETHNIC   | Getacg | ESTSOB  | GAPP     |
| ONMARG   | CCM     | C19INTGR | DAD    | COVAXON | OLIS     |
| CAPE     | NMS     | OCCI     | OHCAS  |         |          |

**Table E2. Variables included in the propensity score for matching\***

\* also used for hard matching

| Variable                           | Definition and/or source                                                                                                                                                                                                                                                             |
|------------------------------------|--------------------------------------------------------------------------------------------------------------------------------------------------------------------------------------------------------------------------------------------------------------------------------------|
| Sex*                               | Male, female                                                                                                                                                                                                                                                                         |
| Week of outbreak*                  | Index date January 28, 2020; two-week blocks                                                                                                                                                                                                                                         |
| Hospitalization*                   | On or within 2 weeks after the index date                                                                                                                                                                                                                                            |
| Public health unit (PHU)*          | OMHRS, DAD                                                                                                                                                                                                                                                                           |
| Age                                | Years, restricted cubic spline                                                                                                                                                                                                                                                       |
| Neighbourhood income quintile      | RPDB, PCCF                                                                                                                                                                                                                                                                           |
| Residential instability            | ONMARG quintiles                                                                                                                                                                                                                                                                     |
| Material deprivation               | ONMARG quintiles                                                                                                                                                                                                                                                                     |
| Dependency                         | ONMARG quintiles                                                                                                                                                                                                                                                                     |
| Ethnic concentration               | ONMARG quintiles                                                                                                                                                                                                                                                                     |
| Rurality                           | RPDB, PCCF                                                                                                                                                                                                                                                                           |
| Week of outbreak                   | Index date January 28, 2020; two-week blocks                                                                                                                                                                                                                                         |
| Diabetes                           | ODD_sensitive                                                                                                                                                                                                                                                                        |
| Pregnancy                          | MOMBABY <sup>1-4</sup>                                                                                                                                                                                                                                                               |
| Hypertension                       | HYPER                                                                                                                                                                                                                                                                                |
| Acute myocardial infarction        | ≥1 DAD ICD10: I21, I22, I25.2                                                                                                                                                                                                                                                        |
| Percutaneous coronary intervention | CIHI DAD/SDS: CCP: 48.02, 48.09; CCI: 1IJ50, 1IJ57GQ 1IJ80, 1IJ26, 1IJ54, 1IJ55; OHIP: Z434, Z448, Z449, Z460, Z461                                                                                                                                                                  |
| Coronary artery bypass surgery     | (CIHI DAD/SDS): CCI 1IJ76; CCP 48.1, 48.2; OHIP R742, R743                                                                                                                                                                                                                           |
| Ischemic stroke                    | One DAD, 2 OHIP, or 1 NACRS&1OHIP: ICD-10 codes I63, I64, H341 (excluding I63.6) as ANY diagnosis type, exclude suspect; ICD-9 code 434, 436 for OHIP                                                                                                                                |
| Hemorrhagic stroke                 | 1 record in DAD or NACRS: ICD-10 I60, I61; ICD-9 430, 431                                                                                                                                                                                                                            |
| Major bleeding event               | ICD 10:<br>GI: I850, I983, K250/252/254/256, K260/262/264/266, K270/272/274/276, K280/282/284/286, K290, K661, K920, K921, K922<br>ICH: I60, I61, I620, I621, I629<br>GU: N020-029, R310, R311, R318<br>Resp: R040, R041, R042, R048, R049<br>Other: R58, D68.3, H35.6, H45.0, M25.0 |

|                                   |                                                                                                                                                                                                                                                                                                                                                                                                                                                                 |                                                           |
|-----------------------------------|-----------------------------------------------------------------------------------------------------------------------------------------------------------------------------------------------------------------------------------------------------------------------------------------------------------------------------------------------------------------------------------------------------------------------------------------------------------------|-----------------------------------------------------------|
| Solid cancer, hematologic cancer  | OCR: OCR_TOPOG_CD, OCR_DIAG_DATE                                                                                                                                                                                                                                                                                                                                                                                                                                |                                                           |
| Same-day surgery in prior 6 weeks | SDS_ADMDATE, SDS_INCODE1-10, SDS_CACSANETECH                                                                                                                                                                                                                                                                                                                                                                                                                    |                                                           |
| Valvular disease                  | ICD9: 394, 395, 396<br>ICD10: I019, I020, I05, I08, I099, I342, I348, I349<br>ICD10 code Z952, and CCI codes 1HS90LACF, 1HT90LACF, 1HU90DACF, 1HU90LACF, 1HU90PNCF, 1HV90LACF, 1HV90LACFA, 1HV90LACFL, 1HV90LACFN, 1HV90WJCFN                                                                                                                                                                                                                                   |                                                           |
| Emphysema                         | COPD_SPECIFIC in COPD database                                                                                                                                                                                                                                                                                                                                                                                                                                  |                                                           |
| Asthma                            | ASTHMA_SPEC in ASTHMA database                                                                                                                                                                                                                                                                                                                                                                                                                                  |                                                           |
| Atrial fibrillation               | Any of the following:<br>-history of hospitalization (CIHI DAD) <sup>5</sup> : ICD9 427.3 or ICD10 I48 as any diagnosis type, including suspected<br>-history of ED visit with same codes<br>-4 OHIP claims in 1 year (OHIP) <i>dxcode</i> 427                                                                                                                                                                                                                  |                                                           |
| Heart failure                     | CHF database                                                                                                                                                                                                                                                                                                                                                                                                                                                    |                                                           |
| Ischemic heart disease            | PCI, CABG, (1 HOSP in DAD with any codes I20-I25) or (2 OHIP billings within a one-year period with dx codes 410-414)                                                                                                                                                                                                                                                                                                                                           |                                                           |
| Renal disease                     | DAD code: ICD10 codes E102, E112, E132, E142, I12, I13, N01.*, N03.*, N05.*, N08.*, N18.*, N19.*, N25.*<br>or<br>Chronic Dialysis (Any 2 codes within 90 days of one another):<br>OHIP: R849, R850, G323, G325, G326, G330, G331, G860, G333, G083, G091, G085, G295, G082, G090, G092, G093, G094, G861, G862, G863, G864, G865, G866, G294, G095, G096 CCP: 51.95, 66.98<br>NACRS: CCI: 1PZ21HQBR, 1PZ21HPD4                                                  |                                                           |
| Pneumonia                         | (CIHI DAD, NACRS, OHIP) – ICD-10 codes J10.0, J11.0 or J12-J18 as ANY diagnosis type, exclude suspected <sup>6</sup> ; OHIP <i>dxcode</i> 486, excluding claims associated with fee codes G538, G539, G840-G848, G590, G591 or G700 (administration of vaccinations)                                                                                                                                                                                            |                                                           |
| Dementia                          | (1 DAD or 3 OHIP billings separated by 30 days, within a 2-year period or any cholinesterase inhibitor from ODB)<br>ICD10 codes F00-F03, F051, G30, G31, R54<br>ICD9 code 290, 294, 331, 797<br>SUBCLNAM= CHOLINESTERASE INHIBITORS<br>ODB: donepezil, galantamine, or rivastigmine (DIN: 02232043, 02232044, 02269457, 02269465, 02244298, 02244299, 02244300, 02244302, 02266717, 02266725) or Tacrine (Cognex) (DIN: 66123288, 66123290, 66123306, 66123318) |                                                           |
| Alcohol substance use disorder    | ICD10 codes F1094, F1029, F1019, F1099, F10250, F10150, F10950, F10920, F10929, F10251, F10251, F10151, F10951, F1027, F1097, F1026, F1096, F10129, F10120, F1010, F1021, F1020, F10220, F10229<br>ICD9 codes 291, 303                                                                                                                                                                                                                                          |                                                           |
| Johns Hopkins ACG score           | Sum of ADGs (from OHIP, NACRS-ED, CIHI DAD)                                                                                                                                                                                                                                                                                                                                                                                                                     |                                                           |
| John Hopkins frailty indicator    | (OHIP, NACRS-ED CIHI DAD)                                                                                                                                                                                                                                                                                                                                                                                                                                       |                                                           |
| Influenza vaccination             | 2019-20 influenza vaccination (OHIP, ODB) – Received between Sep 1, 2019 and COVID test date. Use algorithm in Concept Dictionary and attached MOHLTC bulletin (pdf) for publically funded DINs for 2019-20 season. Note: algorithm does not capture vaccinations received outside doctor's offices and pharmacies                                                                                                                                              |                                                           |
| Venous thromboembolism            | CIHI-NACRS, DAD, OHIP                                                                                                                                                                                                                                                                                                                                                                                                                                           |                                                           |
|                                   | ICD-10 Code                                                                                                                                                                                                                                                                                                                                                                                                                                                     | Description                                               |
|                                   |                                                                                                                                                                                                                                                                                                                                                                                                                                                                 | DX10CODE1 in NACRS, DX10CODE1-10 in DAD                   |
|                                   | I26.*                                                                                                                                                                                                                                                                                                                                                                                                                                                           | Pulmonary embolism                                        |
|                                   | I26.0                                                                                                                                                                                                                                                                                                                                                                                                                                                           | Pulmonary embolism with mention of acute cor pulmonale    |
|                                   | I26.9                                                                                                                                                                                                                                                                                                                                                                                                                                                           | Pulmonary embolism without mention of acute cor pulmonale |
|                                   | I80.*                                                                                                                                                                                                                                                                                                                                                                                                                                                           | Phlebitis and thrombophlebitis <sup>†</sup>               |
|                                   | I80.1                                                                                                                                                                                                                                                                                                                                                                                                                                                           | Phlebitis and thrombophlebitis of femoral vein            |
|                                   | I80.2                                                                                                                                                                                                                                                                                                                                                                                                                                                           | Phlebitis and thrombophlebitis of other deep vessels of   |

|                                                 |                                                                                                                                                                                                                       |                                                                                                                     |
|-------------------------------------------------|-----------------------------------------------------------------------------------------------------------------------------------------------------------------------------------------------------------------------|---------------------------------------------------------------------------------------------------------------------|
|                                                 |                                                                                                                                                                                                                       | lower extremities<br>- Deep vein thrombosis NOS                                                                     |
|                                                 | I80.3                                                                                                                                                                                                                 | Phlebitis and thrombophlebitis of lower extremities, unspecified<br>- Embolism or thrombosis of lower extremity NOS |
|                                                 | I80.8:                                                                                                                                                                                                                | Phlebitis and thrombophlebitis of other sites;                                                                      |
|                                                 | I80.9:                                                                                                                                                                                                                | Phlebitis and thrombophlebitis of unspecified site                                                                  |
|                                                 | I82.*                                                                                                                                                                                                                 | Other venous embolism and thrombosis†                                                                               |
|                                                 | I82.2                                                                                                                                                                                                                 | Embolism and thrombosis of vena cava                                                                                |
|                                                 | I82.8                                                                                                                                                                                                                 | Embolism and thrombosis of other specified veins                                                                    |
|                                                 | I82.9                                                                                                                                                                                                                 | Embolism and thrombosis of unspecified vein<br>-Embolism of vein NOS<br>-Thrombosis of vein NOS                     |
|                                                 | OHIP DXCODE                                                                                                                                                                                                           | Description                                                                                                         |
|                                                 | 415                                                                                                                                                                                                                   | Pulmonary embolism, pulmonary infarction                                                                            |
|                                                 | 451                                                                                                                                                                                                                   | Phlebitis, thrombophlebitis                                                                                         |
|                                                 | 452                                                                                                                                                                                                                   | Portal vein thrombosis                                                                                              |
|                                                 | 453                                                                                                                                                                                                                   | Other venous embolism and thrombosis                                                                                |
|                                                 | †Excludes: I80.0: Phlebitis and thrombophlebitis of superficial vessels of lower extremities<br>‡Excludes: I82.0: Budd-Chiari syndrome, I82.1: thrombophlebitis migrans. I82.3: Embolism and thrombosis of renal vein |                                                                                                                     |
| Mental health inpatient stay                    | NACRS                                                                                                                                                                                                                 |                                                                                                                     |
| Mental health ED visit                          | OHIP <sup>7-9</sup>                                                                                                                                                                                                   |                                                                                                                     |
| MHA Outpatient Services                         | OHIP <sup>7-9</sup>                                                                                                                                                                                                   |                                                                                                                     |
| Outpatient clinical encounters in previous year | OHIP                                                                                                                                                                                                                  |                                                                                                                     |
| ED visits in previous year                      | DAD, NACRS                                                                                                                                                                                                            |                                                                                                                     |
| Same-day surgery in previous year               | SDS_ADMDATE, SDS_INCODE1-10, SDS_CACSANETECH                                                                                                                                                                          |                                                                                                                     |
| Days hospitalized in previous year              | DAD                                                                                                                                                                                                                   |                                                                                                                     |
| Homecare encounters in previous year            | HCD                                                                                                                                                                                                                   |                                                                                                                     |

### Supplemental Material References

1. Aoyama K, Ray JG, Pinto R, et al. Temporal Variations in Incidence and Outcomes of Critical Illness Among Pregnant and Postpartum Women in Canada: A Population-Based Observational Study. *J Obstet Gynaecol Can.* 2019;41(5):631-640.
2. Metcalfe A, Lix LM, Johnson JA, et al. Validation of an obstetric comorbidity index in an external population. *BJOG.* 2015;122(13):1748-1755.
3. Joseph KS, Fahey J, Canadian Perinatal Surveillance S. Validation of perinatal data in the Discharge Abstract Database of the Canadian Institute for Health Information. *Chronic Dis Can.* 2009;29(3):96-100.
4. Samiedaluie S, Peterson S, Brant R, Kaczorowski J, Norman WV. Validating abortion procedure coding in Canadian administrative databases. *BMC Health Serv Res.* 2016;16:255.
5. Tu K, Nieuwlaat R, Cheng SY, et al. Identifying Patients With Atrial Fibrillation in Administrative Data. *Can J Cardiol.* 2016;32(12):1561-1565.
6. Griffin MR, Zhu Y, Moore MR, Whitney CG, Grijalva CG. U.S. hospitalizations for pneumonia after a decade of pneumococcal vaccination. *N Engl J Med.* 2013;369(2):155-163.
7. MHASEF Research Team. Mental Health and Addictions System Performance in Ontario: A Baseline Scorecard. Toronto, ON: Institute for Clinical Evaluative Sciences; 2018. Available from: <https://www.ices.on.ca/Publications/Atlases-and-Reports/2018/MHASEF>.
8. MHASEF Research Team. The Mental Health of Children and Youth in Ontario: 2017 Scorecard. Toronto, ON: Institute for Clinical Evaluative Sciences; 2017. ISBN: 978-1-926850-72-6. Available

- from: <https://www.ices.on.ca/Publications/Atlases-and-Reports/2017/MHASEF>.
9. ICES Data Dictionary.  
<https://datadictionary.ices.on.ca/Applications/DataDictionary/Default.aspx>.  
Last accessed February 11, 2022.

**Table E3:** Unmatched cohort, baseline characteristics

|                                      |               | Negative SARS-CoV-2 PCR | Positive SARS-CoV-2 PCR | Total             | Standardized Difference |
|--------------------------------------|---------------|-------------------------|-------------------------|-------------------|-------------------------|
| VARIABLE                             |               | N=3,362,519             | N=268,521               | N=3,631,040       |                         |
| Age, years                           | Mean $\pm$ SD | 46.77 $\pm$ 18.17       | 44.18 $\pm$ 17.18       | 46.58 $\pm$ 18.11 | 0.15                    |
|                                      | Median (IQR)  | 45 (31-60)              | 43 (29-56)              | 45 (31-60)        | 0.14                    |
| Women, n (%)                         |               | 1,864,241 (55.4%)       | 137,245 (51.1%)         | 2,001,486 (55.1%) | 0.09                    |
| Income Quintile, n (%)               | Missing       | 10,050 (0.3%)           | 774 (0.3%)              | 10,824 (0.3%)     | 0                       |
|                                      | 1             | 630,532 (18.8%)         | 66,584 (24.8%)          | 697,116 (19.2%)   | 0.15                    |
|                                      | 2             | 649,204 (19.3%)         | 58,115 (21.6%)          | 707,319 (19.5%)   | 0.06                    |
|                                      | 3             | 672,162 (20.0%)         | 57,233 (21.3%)          | 729,395 (20.1%)   | 0.03                    |
|                                      | 4             | 684,228 (20.3%)         | 47,450 (17.7%)          | 731,678 (20.2%)   | 0.07                    |
|                                      | 5             | 716,343 (21.3%)         | 38,365 (14.3%)          | 754,708 (20.8%)   | 0.18                    |
| Instability Quintile, n (%)          | Missing       | 37,365 (1.1%)           | 2,063 (0.8%)            | 39,428 (1.1%)     | 0.04                    |
|                                      | 1             | 691,223 (20.6%)         | 72,327 (26.9%)          | 763,550 (21.0%)   | 0.15                    |
|                                      | 2             | 626,597 (18.6%)         | 44,606 (16.6%)          | 671,203 (18.5%)   | 0.05                    |
|                                      | 3             | 610,179 (18.1%)         | 40,798 (15.2%)          | 650,977 (17.9%)   | 0.08                    |
|                                      | 4             | 610,967 (18.2%)         | 43,693 (16.3%)          | 654,660 (18.0%)   | 0.05                    |
|                                      | 5             | 786,188 (23.4%)         | 65,034 (24.2%)          | 851,222 (23.4%)   | 0.02                    |
| Deprivation Quintile, n (%)          | Missing       | 37,365 (1.1%)           | 2,063 (0.8%)            | 39,428 (1.1%)     | 0.04                    |
|                                      | 1             | 802,901 (23.9%)         | 45,106 (16.8%)          | 848,007 (23.4%)   | 0.18                    |
|                                      | 2             | 708,278 (21.1%)         | 47,637 (17.7%)          | 755,915 (20.8%)   | 0.08                    |
|                                      | 3             | 632,209 (18.8%)         | 52,504 (19.6%)          | 684,713 (18.9%)   | 0.02                    |
|                                      | 4             | 594,666 (17.7%)         | 55,590 (20.7%)          | 650,256 (17.9%)   | 0.08                    |
|                                      | 5             | 587,100 (17.5%)         | 65,621 (24.4%)          | 652,721 (18.0%)   | 0.17                    |
| Dependency Quintile, n (%)           | Missing       | 37,365 (1.1%)           | 2,063 (0.8%)            | 39,428 (1.1%)     | 0.04                    |
|                                      | 1             | 901,394 (26.8%)         | 91,929 (34.2%)          | 993,323 (27.4%)   | 0.16                    |
|                                      | 2             | 671,373 (20.0%)         | 59,930 (22.3%)          | 731,303 (20.1%)   | 0.06                    |
|                                      | 3             | 582,059 (17.3%)         | 44,238 (16.5%)          | 626,297 (17.2%)   | 0.02                    |
|                                      | 4             | 557,097 (16.6%)         | 37,506 (14.0%)          | 594,603 (16.4%)   | 0.07                    |
|                                      | 5             | 613,231 (18.2%)         | 32,855 (12.2%)          | 646,086 (17.8%)   | 0.17                    |
| Ethnic Concentration Quintile, n (%) | Missing       | 37,365 (1.1%)           | 2,063 (0.8%)            | 39,428 (1.1%)     | 0.04                    |
|                                      | 1             | 535,172 (15.9%)         | 17,294 (6.4%)           | 552,466 (15.2%)   | 0.3                     |
|                                      | 2             | 579,980 (17.2%)         | 24,901 (9.3%)           | 604,881 (16.7%)   | 0.24                    |
|                                      | 3             | 635,538 (18.9%)         | 35,134 (13.1%)          | 670,672 (18.5%)   | 0.16                    |
|                                      | 4             | 726,900 (21.6%)         | 57,068 (21.3%)          | 783,968 (21.6%)   | 0.01                    |
|                                      | 5             | 847,564 (25.2%)         | 132,061 (49.2%)         | 979,625 (27.0%)   | 0.51                    |
| Rural, n (%)                         | Missing       | 8,780 (0.3%)            | 671 (0.2%)              | 9,451 (0.3%)      | 0                       |
|                                      |               | 339,985 (10.1%)         | 10,538 (3.9%)           | 350,523 (9.7%)    | 0.24                    |
| Pandemic Quarter                     | 2020-Q1       | 19,479 (0.6%)           | 3,457 (1.3%)            | 22,936 (0.6%)     | 0.07                    |
|                                      | 2020-Q2       | 297,938 (8.9%)          | 21,179 (7.9%)           | 319,117 (8.8%)    | 0.04                    |
|                                      | 2020-Q3       | 686,688 (20.4%)         | 14,775 (5.5%)           | 701,463 (19.3%)   | 0.46                    |
|                                      | 2020-Q4       | 972,169 (28.9%)         | 104,177 (38.8%)         | 1,076,346 (29.6%) | 0.21                    |
|                                      | 2021-Q1       | 1,386,245 (41.2%)       | 124,933 (46.5%)         | 1,511,178 (41.6%) | 0.11                    |
| Received 2 vaccine doses, n (%)      |               | 71,870 (2.1%)           | 300 (0.1%)              | 72,170 (2.0%)     | 0.19                    |
| Received 1 vaccine dose, n (%)       |               | 78,444 (2.3%)           | 1,403 (0.5%)            | 79,847 (2.2%)     | 0.15                    |
| Received 0 vaccine doses, n (%)      |               | 3,212,205 (95.5%)       | 266,818 (99.4%)         | 3,479,023 (95.8%) | 0.25                    |



|                                                       |              |                   |                |                   |      |
|-------------------------------------------------------|--------------|-------------------|----------------|-------------------|------|
| Aggregated diagnosis group                            | Mean ± SD    | 5.82 ± 3.80       | 5.59 ± 3.69    | 5.81 ± 3.79       | 0.06 |
|                                                       | Median (IQR) | 5 (3-8)           | 5 (3-8)        | 5 (3-8)           | 0.06 |
| Hospital Frailty Risk Score                           | Mean ± SD    | 2.42 ± 4.76       | 2.40 ± 5.03    | 2.42 ± 4.78       | 0    |
|                                                       | Median (IQR) | 0 (0-3)           | 0 (0-2)        | 0 (0-3)           | 0.06 |
| Hospitalizations in prior year                        | Mean ± SD    | 0.10 ± 0.45       | 0.07 ± 0.39    | 0.10 ± 0.44       | 0.07 |
|                                                       | Median (IQR) | 0 (0-0)           | 0 (0-0)        | 0 (0-0)           | 0.09 |
| Clinic visits in prior year                           | Mean ± SD    | 6.56 ± 8.35       | 6.27 ± 7.86    | 6.54 ± 8.32       | 0.04 |
|                                                       | Median (IQR) | 4 (1-9)           | 4 (1-9)        | 4 (1-9)           | 0.03 |
| Homecare visits in prior year                         | Mean ± SD    | 3.10 ± 25.71      | 2.92 ± 26.23   | 3.09 ± 25.75      | 0.01 |
|                                                       | Median (IQR) | 0 (0-0)           | 0 (0-0)        | 0 (0-0)           | 0.07 |
| ED visits in prior year                               | Mean ± SD    | 0.50 ± 1.45       | 0.41 ± 1.42    | 0.49 ± 1.45       | 0.06 |
|                                                       | Median (IQR) | 0 (0-1)           | 0 (0-0)        | 0 (0-1)           | 0.08 |
| Days hospitalized in prior year                       | Mean ± SD    | 1.02 ± 6.85       | 0.83 ± 7.88    | 1.00 ± 6.93       | 0.03 |
|                                                       | Median (IQR) | 0 (0-0)           | 0 (0-0)        | 0 (0-0)           | 0.15 |
| Hospitalized within 2 weeks, n (%)                    |              | 246,238 (7.3%)    | 14,942 (5.6%)  | 261,180 (7.2%)    | 0.07 |
| Admitted to intensive care unit within 2 weeks, n (%) |              | 31,068 (0.9%)     | 2,933 (1.1%)   | 34,001 (0.9%)     | 0.02 |
| Johns Hopkins Frailty Index, n (%)                    |              | 116,104 (3.5%)    | 7,895 (2.9%)   | 123,999 (3.4%)    | 0.03 |
| Flu vaccine within prior year, n (%)                  |              | 1,064,518 (31.7%) | 66,351 (24.7%) | 1,130,869 (31.1%) | 0.15 |
| Pregnancy, n (%)                                      |              | 29,558 (0.9%)     | 1,855 (0.7%)   | 31,413 (0.9%)     | 0.02 |
| Hypertension, n (%)                                   |              | 816,144 (24.3%)   | 61,708 (23.0%) | 877,852 (24.2%)   | 0.03 |
| Diabetes, n (%)                                       |              | 395,575 (11.8%)   | 37,775 (14.1%) | 433,350 (11.9%)   | 0.07 |
| Emphysema, n (%)                                      |              | 93,686 (2.8%)     | 4,138 (1.5%)   | 97,824 (2.7%)     | 0.09 |
| Heart failure, n (%)                                  |              | 88,669 (2.6%)     | 4,994 (1.9%)   | 93,663 (2.6%)     | 0.05 |
| Dementia, n (%)                                       |              | 42,410 (1.3%)     | 3,274 (1.2%)   | 45,684 (1.3%)     | 0    |
| Asthma, n (%)                                         |              | 414,612 (12.3%)   | 28,270 (10.5%) | 442,882 (12.2%)   | 0.06 |
| Cancer, n (%)                                         |              | 112,188 (3.3%)    | 4,809 (1.8%)   | 116,997 (3.2%)    | 0.1  |
| Surgery in prior 6 weeks, n (%)                       |              | 57,709 (1.7%)     | 2,215 (0.8%)   | 59,924 (1.7%)     | 0.08 |
| Ischemic stroke, n (%)                                |              | 42,908 (1.3%)     | 2,547 (0.9%)   | 45,455 (1.3%)     | 0.03 |
| Hemorrhagic stroke, n (%)                             |              | 3,533 (0.1%)      | 224 (0.1%)     | 3,757 (0.1%)      | 0.01 |
| Valvular disease, n (%)                               |              | 4,609 (0.1%)      | 235 (0.1%)     | 4,844 (0.1%)      | 0.01 |
| Atrial fibrillation, n (%)                            |              | 93,557 (2.8%)     | 4,896 (1.8%)   | 98,453 (2.7%)     | 0.06 |
| Myocardial infarction, n (%)                          |              | 33,446 (1.0%)     | 1,801 (0.7%)   | 35,247 (1.0%)     | 0.04 |
| Percutaneous coronary intervention, n (%)             |              | 39,373 (1.2%)     | 2,231 (0.8%)   | 41,604 (1.1%)     | 0.03 |
| Coronary artery bypass, n (%)                         |              | 11,845 (0.4%)     | 648 (0.2%)     | 12,493 (0.3%)     | 0.02 |
| Ischemic heart disease, n (%)                         |              | 167,514 (5.0%)    | 9,846 (3.7%)   | 177,360 (4.9%)    | 0.06 |
| Major bleeding, n (%)                                 |              | 37,210 (1.1%)     | 2,156 (0.8%)   | 39,366 (1.1%)     | 0.03 |
| Renal disease, n (%)                                  |              | 43,949 (1.3%)     | 2,779 (1.0%)   | 46,728 (1.3%)     | 0.03 |
| Pneumonia, n (%)                                      |              | 271,036 (8.1%)    | 20,166 (7.5%)  | 291,202 (8.0%)    | 0.02 |
| Alcohol use disorder, n (%)                           |              | 27,759 (0.8%)     | 1,668 (0.6%)   | 29,427 (0.8%)     | 0.02 |
| Venous thromboembolism, n (%)                         |              | 396,371 (11.8%)   | 24,085 (9.0%)  | 420,456 (11.6%)   | 0.09 |
| Mental health hospitalization, n (%)                  |              | 77,945 (2.3%)     | 4,470 (1.7%)   | 82,415 (2.3%)     | 0.05 |
| Mental health emergency visit, n (%)                  |              | 188,832 (5.6%)    | 11,469 (4.3%)  | 200,301 (5.5%)    | 0.06 |
| Mental health clinic visit, n (%)                     |              | 747,646 (22.2%)   | 48,712 (18.1%) | 796,358 (21.9%)   | 0.1  |
| Hospital mental health diagnoses, no. (%)             |              |                   |                |                   |      |

|                                                        |                 |               |                 |      |
|--------------------------------------------------------|-----------------|---------------|-----------------|------|
| Substance use disorder                                 | 19,681 (0.6%)   | 1,138 (0.4%)  | 20,819 (0.6%)   | 0.02 |
| Dementia/Alzheimer's                                   | 2,034 (0.1%)    | 193 (0.1%)    | 2,227 (0.1%)    | 0    |
| Delirium                                               | 5,696 (0.2%)    | 423 (0.2%)    | 6,119 (0.2%)    | 0    |
| Anxiety                                                | 4,340 (0.1%)    | 203 (0.1%)    | 4,543 (0.1%)    | 0.02 |
| Deliberate self-harm                                   | 5,492 (0.2%)    | 354 (0.1%)    | 5,846 (0.2%)    | 0.01 |
| Schizophrenia                                          | 14,352 (0.4%)   | 937 (0.3%)    | 15,289 (0.4%)   | 0.01 |
| Mood disorders                                         | 636 (0.0%)      | 23 (0.0%)     | 659 (0.0%)      | 0.01 |
| Mood disorder - bipolar                                | 8,380 (0.2%)    | 417 (0.2%)    | 8,797 (0.2%)    | 0.02 |
| Mood disorder - depression                             | 21,114 (0.6%)   | 1,015 (0.4%)  | 22,129 (0.6%)   | 0.04 |
| Mood disorder - other                                  | 347 (0.0%)      | 12 (0.0%)     | 359 (0.0%)      | 0.01 |
| Personality disorders                                  | 5,683 (0.2%)    | 234 (0.1%)    | 5,917 (0.2%)    | 0.02 |
| Nonclassified                                          | 4,919 (0.1%)    | 302 (0.1%)    | 5,221 (0.1%)    | 0.01 |
| Trauma/stress related disorders                        | 9,008 (0.3%)    | 443 (0.2%)    | 9,451 (0.3%)    | 0.02 |
| Obsessive compulsive disorder                          | 465 (0.0%)      | 26 (0.0%)     | 491 (0.0%)      | 0    |
| Eating disorder                                        | 854 (0.0%)      | 37 (0.0%)     | 891 (0.0%)      | 0.01 |
| Emergency department mental health diagnoses, no. (%)  |                 |               |                 |      |
| Substance use disorder                                 | 60,371 (1.8%)   | 4,178 (1.6%)  | 64,549 (1.8%)   | 0.02 |
| Dementia/Alzheimer's                                   | 1,971 (0.1%)    | 158 (0.1%)    | 2,129 (0.1%)    | 0    |
| Delirium                                               | 1,195 (0.0%)    | 72 (0.0%)     | 1,267 (0.0%)    | 0    |
| Anxiety                                                | 68,125 (2.0%)   | 3,872 (1.4%)  | 71,997 (2.0%)   | 0.04 |
| Deliberate self-harm                                   | 16,222 (0.5%)   | 1,057 (0.4%)  | 17,279 (0.5%)   | 0.01 |
| Schizophrenia                                          | 11,013 (0.3%)   | 745 (0.3%)    | 11,758 (0.3%)   | 0.01 |
| Bipolar                                                | 5,640 (0.2%)    | 262 (0.1%)    | 5,902 (0.2%)    | 0.02 |
| Depression                                             | 34,030 (1.0%)   | 1,778 (0.7%)  | 35,808 (1.0%)   | 0.04 |
| Other                                                  | 2,265 (0.1%)    | 108 (0.0%)    | 2,373 (0.1%)    | 0.01 |
| Personality disorders                                  | 8,318 (0.2%)    | 446 (0.2%)    | 8,764 (0.2%)    | 0.02 |
| Nonclassified                                          | 6,950 (0.2%)    | 473 (0.2%)    | 7,423 (0.2%)    | 0.01 |
| Trauma/stress related disorders                        | 41,958 (1.2%)   | 2,202 (0.8%)  | 44,160 (1.2%)   | 0.04 |
| Obsessive compulsive disorder                          | 626 (0.0%)      | 39 (0.0%)     | 665 (0.0%)      | 0    |
| Eating disorder                                        | 614 (0.0%)      | 22 (0.0%)     | 636 (0.0%)      | 0.01 |
| Outpatient OHIP mental health diagnosis codes, no. (%) |                 |               |                 |      |
| Psychotic disorders                                    | 43,698 (1.3%)   | 3,137 (1.2%)  | 46,835 (1.3%)   | 0.01 |
| Mood and anxiety disorders                             | 385,325 (11.5%) | 22,799 (8.5%) | 408,124 (11.2%) | 0.1  |
| Substance use disorders                                | 110,162 (3.3%)  | 6,198 (2.3%)  | 116,360 (3.2%)  | 0.06 |
| Non-psychotic disorders                                | 190,835 (5.7%)  | 12,795 (4.8%) | 203,630 (5.6%)  | 0.04 |
| Social problems                                        | 127,299 (3.8%)  | 8,967 (3.3%)  | 136,266 (3.8%)  | 0.02 |
| Other                                                  | 139,737 (4.2%)  | 9,465 (3.5%)  | 149,202 (4.1%)  | 0.03 |

**Table E4:** Distribution of baseline healthcare utilization rates (per person-year) for the matched cohort (n= 530,232), overall and stratified by sex.

| Rate of baseline healthcare utilization (previous year; per person year) | SARS-CoV-2 PCR Test Result | Mean | std  | Q1  | Median | Q3   | p95  | p99   |
|--------------------------------------------------------------------------|----------------------------|------|------|-----|--------|------|------|-------|
| <b>Overall</b>                                                           |                            |      |      |     |        |      |      |       |
| Outpatient clinical encounters                                           | Negative                   | 6.3  | 7.9  | 1.0 | 4.0    | 8.0  | 21.0 | 37.0  |
|                                                                          | Positive                   | 6.3  | 7.8  | 1.0 | 4.0    | 8.0  | 21.0 | 36.0  |
| Homecare encounters                                                      | Negative                   | 2.7  | 25.0 | 0.0 | 0.0    | 0.0  | 0.0  | 91.1  |
|                                                                          | Positive                   | 2.8  | 25.7 | 0.0 | 0.0    | 0.0  | 0.0  | 95.1  |
| Emergency department visits                                              | Negative                   | 0.4  | 1.2  | 0.0 | 0.0    | 0.0  | 2.0  | 4.0   |
|                                                                          | Positive                   | 0.4  | 1.4  | 0.0 | 0.0    | 0.0  | 2.0  | 4.0   |
| Days hospitalized                                                        | Negative                   | 0.8  | 6.9  | 0.0 | 0.0    | 0.0  | 2.0  | 17.0  |
|                                                                          | Positive                   | 0.8  | 7.3  | 0.0 | 0.0    | 0.0  | 2.0  | 17.0  |
| <b>Total healthcare utilization</b>                                      | Negative                   | 10.2 | 29.5 | 1.0 | 4.0    | 10.0 | 29.0 | 131.1 |
|                                                                          | Positive                   | 10.3 | 30.3 | 1.0 | 4.0    | 10.0 | 28.0 | 137.1 |
| <b>Women (n=271,346)</b>                                                 |                            |      |      |     |        |      |      |       |
| Outpatient clinical encounters                                           | Negative                   | 7.2  | 8.3  | 2.0 | 5.0    | 10.0 | 23.0 | 38.0  |
|                                                                          | Positive                   | 7.3  | 8.2  | 2.0 | 5.0    | 10.0 | 23.0 | 38.0  |
| Homecare encounters                                                      | Negative                   | 3.1  | 26.8 | 0.0 | 0.0    | 0.0  | 0.0  | 104.1 |
|                                                                          | Positive                   | 3.5  | 29.4 | 0.0 | 0.0    | 0.0  | 0.0  | 132.1 |
| Emergency department visits                                              | Negative                   | 0.4  | 1.1  | 0.0 | 0.0    | 0.0  | 2.0  | 4.0   |
|                                                                          | Positive                   | 0.4  | 1.2  | 0.0 | 0.0    | 0.0  | 2.0  | 4.0   |
| Days hospitalized                                                        | Negative                   | 0.7  | 6.2  | 0.0 | 0.0    | 0.0  | 2.0  | 15.0  |
|                                                                          | Positive                   | 0.8  | 6.4  | 0.0 | 0.0    | 0.0  | 2.0  | 16.0  |
| <b>Men (n=258,886)</b>                                                   |                            |      |      |     |        |      |      |       |
| Outpatient clinical encounters                                           | Negative                   | 5.3  | 7.4  | 1.0 | 3.0    | 7.0  | 19.0 | 35.0  |
|                                                                          | Positive                   | 5.2  | 7.4  | 1.0 | 3.0    | 7.0  | 18.0 | 34.0  |
| Homecare encounters                                                      | Negative                   | 2.4  | 22.8 | 0.0 | 0.0    | 0.0  | 0.0  | 68.0  |
|                                                                          | Positive                   | 2.0  | 21.1 | 0.0 | 0.0    | 0.0  | 0.0  | 50.0  |
| Emergency department visits                                              | Negative                   | 0.4  | 1.2  | 0.0 | 0.0    | 0.0  | 2.0  | 4.0   |
|                                                                          | Positive                   | 0.4  | 1.5  | 0.0 | 0.0    | 0.0  | 2.0  | 4.0   |
| Days hospitalized                                                        | Negative                   | 0.9  | 7.6  | 0.0 | 0.0    | 0.0  | 2.0  | 20.0  |
|                                                                          | Positive                   | 0.8  | 8.1  | 0.0 | 0.0    | 0.0  | 1.0  | 18.0  |

**Table E5:** Sensitivity analyses: (A) Follow-up begins after hospital discharge or 56 days, whichever occurred later, (B) follow-up censored on the date of entrance to long-term care, (C) follow-up censored at 6 months, and (D) matched by intensive care admission within two weeks after index date. All comparisons are for test-positive versus test-negative individuals. Distribution of follow-up time included for each analysis. Healthcare utilization rates reported per person-year. The difference in overall healthcare utilization rates between test-positive and negative individuals are reported for the mean, 95th percentile, and 99th percentile. Samples sizes as noted below.

| Rates (per person-year)                                                                       | SARS-CoV-2 Positive PCR Test Result | Mean | std  | Δ for mean | Q1  | Median | Q3   | p95  | p99   | Δ for 95th percentile | Δ for 99th percentile |
|-----------------------------------------------------------------------------------------------|-------------------------------------|------|------|------------|-----|--------|------|------|-------|-----------------------|-----------------------|
|                                                                                               |                                     |      |      |            |     |        |      |      |       |                       |                       |
| <b>Sensitivity analysis (A): Follow-up ≥56 days (after hospital discharge) (n=530,232)</b>    |                                     |      |      |            |     |        |      |      |       |                       |                       |
| Total healthcare utilization                                                                  | Negative                            | 12.8 | 40.5 |            | 1.2 | 4.5    | 10.7 | 34.5 | 264.4 |                       |                       |
|                                                                                               | Positive                            | 14.2 | 45.1 | 1.3        | 1.4 | 4.9    | 11.3 | 36.4 | 335.4 | 1.8                   | 71.0                  |
| Outpatient clinical encounters                                                                | Negative                            | 7.1  | 10.6 |            | 0.0 | 4.0    | 9.5  | 24.7 | 45.1  |                       |                       |
|                                                                                               | Positive                            | 7.4  | 11.2 | 0.3        | 1.0 | 4.4    | 10.1 | 25.2 | 45.0  | 0.6                   | -0.1                  |
| Homecare encounters                                                                           | Negative                            | 4.1  | 32.4 |            | 0.0 | 0.0    | 0.0  | 0.0  | 167.4 |                       |                       |
|                                                                                               | Positive                            | 4.2  | 32.5 | 0.0        | 0.0 | 0.0    | 0.0  | 0.0  | 169.6 | 0.0                   | 2.2                   |
| Emergency department visits                                                                   | Negative                            | 0.4  | 1.5  |            | 0.0 | 0.0    | 0.0  | 2.5  | 5.4   |                       |                       |
|                                                                                               | Positive                            | 0.4  | 1.7  | 0.0        | 0.0 | 0.0    | 0.0  | 2.4  | 5.5   | 0.0                   | 0.1                   |
| Days hospitalized                                                                             | Negative                            | 0.7  | 8.3  |            | 0.0 | 0.0    | 0.0  | 1.7  | 13.8  |                       |                       |
|                                                                                               | Positive                            | 1.0  | 11.7 | 0.3        | 0.0 | 0.0    | 0.0  | 1.8  | 16.0  | 0.1                   | 2.2                   |
| Days in long-term care                                                                        | Negative                            | 0.5  | 11.6 |            | 0.0 | 0.0    | 0.0  | 0.0  | 0.0   |                       |                       |
|                                                                                               | Positive                            | 1.2  | 19.2 | 0.7        | 0.0 | 0.0    | 0.0  | 0.0  | 0.0   | 0.0                   | 0.0                   |
| Follow-up (days)                                                                              | Negative                            | 240  | 87   |            | 187 | 221    | 267  | 457  | 495   |                       |                       |
|                                                                                               | Positive                            | 240  | 87   |            | 188 | 221    | 267  | 457  | 494   |                       |                       |
| <b>Sensitivity analysis (B): Follow-up censored at entrance to long-term care (n=530,232)</b> |                                     |      |      |            |     |        |      |      |       |                       |                       |
| Rates (per person-year)                                                                       |                                     | Mean | std  | Δ for mean | Q1  | Median | Q3   | p95  | p99   | Δ for 95th percentile | Δ for 99th percentile |
| Total healthcare utilization                                                                  | Negative                            | 12.5 | 39.2 |            | 1.2 | 4.5    | 10.7 | 34.2 | 243.5 |                       |                       |
|                                                                                               | Positive                            | 13.6 | 42.5 | 1.1        | 1.4 | 4.9    | 11.2 | 35.7 | 297.5 | 1.5                   | 54.0                  |
| Outpatient clinical encounters                                                                | Negative                            | 7.1  | 10.4 |            | 0.0 | 4.0    | 9.6  | 24.7 | 45.2  |                       |                       |
|                                                                                               | Positive                            | 7.4  | 10.7 | 0.3        | 1.0 | 4.4    | 10.1 | 25.4 | 45.2  | 0.7                   | 0.0                   |
| Homecare encounters                                                                           | Negative                            | 4.2  | 32.8 |            | 0.0 | 0.0    | 0.0  | 0.0  | 172.1 |                       |                       |
|                                                                                               | Positive                            | 4.3  | 33.3 | 0.1        | 0.0 | 0.0    | 0.0  | 0.0  | 182.6 | 0.0                   | 10.5                  |
| Emergency department visits                                                                   | Negative                            | 0.4  | 1.5  |            | 0.0 | 0.0    | 0.0  | 2.5  | 5.4   |                       |                       |
|                                                                                               | Positive                            | 0.4  | 1.7  | 0.0        | 0.0 | 0.0    | 0.0  | 2.4  | 5.5   | 0.0                   | 0.1                   |
| Days hospitalized                                                                             | Negative                            | 0.8  | 10.1 |            | 0.0 | 0.0    | 0.0  | 1.7  | 14.5  |                       |                       |
|                                                                                               | Positive                            | 1.5  | 16.7 | 0.6        | 0.0 | 0.0    | 0.0  | 1.9  | 22.1  | 0.1                   | 7.6                   |
| Days in long-term care                                                                        | Negative                            | .    | .    |            | .   | .      | .    | .    | .     |                       |                       |
|                                                                                               | Positive                            | .    | .    |            | .   | .      | .    | .    | .     |                       |                       |
| Follow-up (days)                                                                              | Negative                            | 240  | 87   |            | 186 | 221    | 267  | 457  | 495   |                       |                       |
|                                                                                               | Positive                            | 239  | 88   |            | 187 | 220    | 267  | 457  | 494   |                       |                       |
| <b>Sensitivity analysis (C) Follow-up censored at 6 months (n=530,232)</b>                    |                                     |      |      |            |     |        |      |      |       |                       |                       |
| Rates (per person-year)                                                                       |                                     | Mean | std  | Δ for mean | Q1  | Median | Q3   | p95  | p99   | Δ for 95th percentile | Δ for 99th percentile |
| Total healthcare utilization                                                                  | Negative                            | 12.8 | 40.6 |            | 0.0 | 4.0    | 10.1 | 35.1 | 264.4 |                       |                       |
|                                                                                               | Positive                            | 14.3 | 45.0 | 4.4        | 0.0 | 4.0    | 12.1 | 38.3 | 337.0 | 3.2                   | 72.6                  |
| Outpatient clinical encounters                                                                | Negative                            | 7.1  | 10.7 |            | 0.0 | 4.0    | 10.1 | 26.2 | 46.4  |                       |                       |

|                             |          |     |      |      |     |     |      |      |       |     |      |
|-----------------------------|----------|-----|------|------|-----|-----|------|------|-------|-----|------|
| Homecare encounters         | Positive | 7.5 | 11.0 | 0.3  | 0.0 | 4.0 | 10.1 | 26.2 | 46.4  | 0.0 | 0.0  |
|                             | Negative | 4.1 | 32.6 |      | 0.0 | 0.0 | 0.0  | 0.0  | 167.5 |     |      |
| Emergency department visits | Positive | 4.1 | 32.5 | -0.1 | 0.0 | 0.0 | 0.0  | 0.0  | 163.5 | 0.0 | -4.0 |
|                             | Negative | 0.4 | 1.5  |      | 0.0 | 0.0 | 0.0  | 2.2  | 6.1   |     |      |
| Days hospitalized           | Positive | 0.4 | 1.7  | 0.2  | 0.0 | 0.0 | 0.0  | 2.1  | 6.1   | 0.0 | 0.0  |
|                             | Negative | 0.8 | 9.0  |      | 0.0 | 0.0 | 0.0  | 2.0  | 14.1  |     |      |
| Days in long-term care      | Positive | 1.3 | 13.7 | 4.7  | 0.0 | 0.0 | 0.0  | 2.0  | 22.2  | 0.0 | 8.1  |
|                             | Negative | 0.4 | 10.7 |      | 0.0 | 0.0 | 0.0  | 0.0  | 0.0   |     |      |
| <b>Follow-up (days)</b>     | Positive | 1.0 | 17.2 | 6.4  | 0.0 | 0.0 | 0.0  | 0.0  | 0.0   | 0.0 | 0.0  |
|                             | Negative | 174 | 17   |      | 181 | 181 | 181  | 181  | 181   |     |      |
|                             | Positive | 174 | 17   |      | 181 | 181 | 181  | 181  | 181   |     |      |

| <b>Sensitivity analysis (D) Matched by intensive care unit admission within 2 weeks after index date (n=508,662)</b> |          |             |            |                   |           |               |           |            |            |                              |                              |
|----------------------------------------------------------------------------------------------------------------------|----------|-------------|------------|-------------------|-----------|---------------|-----------|------------|------------|------------------------------|------------------------------|
| <b>Rates (per person-year)</b>                                                                                       |          | <b>Mean</b> | <b>std</b> | <b>Δ for mean</b> | <b>Q1</b> | <b>Median</b> | <b>Q3</b> | <b>p95</b> | <b>p99</b> | <b>Δ for 95th percentile</b> | <b>Δ for 99th percentile</b> |
| Total healthcare utilization                                                                                         | Negative | 12.8        | 40.6       |                   | 1.1       | 4.5           | 10.7      | 34.5       | 268.1      |                              |                              |
|                                                                                                                      | Positive | 14.1        | 44.6       | 1.3               | 1.4       | 4.9           | 11.2      | 36.2       | 332.5      | 1.7                          | 64.4                         |
| Outpatient clinical encounters                                                                                       | Negative | 7.1         | 10.3       |                   | 0.0       | 4.0           | 9.5       | 24.6       | 45.3       |                              |                              |
|                                                                                                                      | Positive | 7.4         | 10.6       | 0.3               | 1.0       | 4.4           | 10.0      | 25.2       | 44.9       | 0.6                          | -0.4                         |
| Homecare encounters                                                                                                  | Negative | 4.1         | 32.4       |                   | 0.0       | 0.0           | 0.0       | 0.0        | 163.5      |                              |                              |
|                                                                                                                      | Positive | 4.1         | 32.0       | 0.0               | 0.0       | 0.0           | 0.0       | 0.0        | 161.4      | 0.0                          | -2.2                         |
| Emergency department visits                                                                                          | Negative | 0.4         | 1.5        |                   | 0.0       | 0.0           | 0.0       | 2.5        | 5.4        |                              |                              |
|                                                                                                                      | Positive | 0.4         | 1.7        | 0.0               | 0.0       | 0.0           | 0.0       | 2.4        | 5.5        | 0.0                          | 0.0                          |
| Days hospitalized                                                                                                    | Negative | 0.8         | 8.8        |                   | 0.0       | 0.0           | 0.0       | 1.7        | 13.9       |                              |                              |
|                                                                                                                      | Positive | 1.1         | 12.4       | 0.4               | 0.0       | 0.0           | 0.0       | 1.8        | 20.1       | 0.1                          | 6.2                          |
| Days in long-term care                                                                                               | Negative | 0.5         | 11.7       |                   | 0.0       | 0.0           | 0.0       | 0.0        | 0.0        |                              |                              |
|                                                                                                                      | Positive | 1.1         | 18.2       | 0.6               | 0.0       | 0.0           | 0.0       | 0.0        | 0.0        | 0.0                          | 0.0                          |
